# Supplementary material
Source: Springer Nature journal article supplement (https://www.springermedizin.de/resource/supplementary/13000_2012_557_MOESM1_ESM.pdf/9625038)

NNK  
(Mutagen from tobacco smoke)

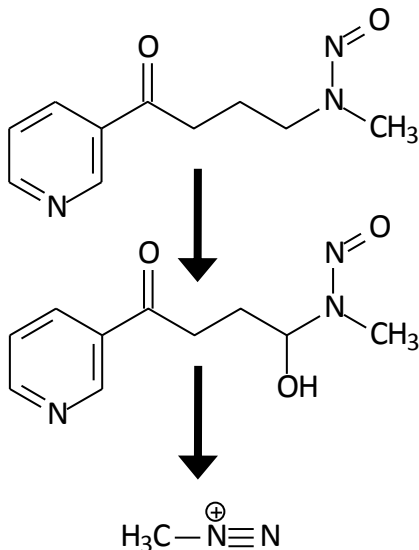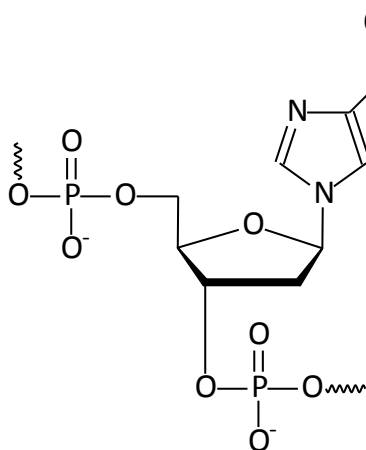

DNA:  
Guanine residue

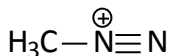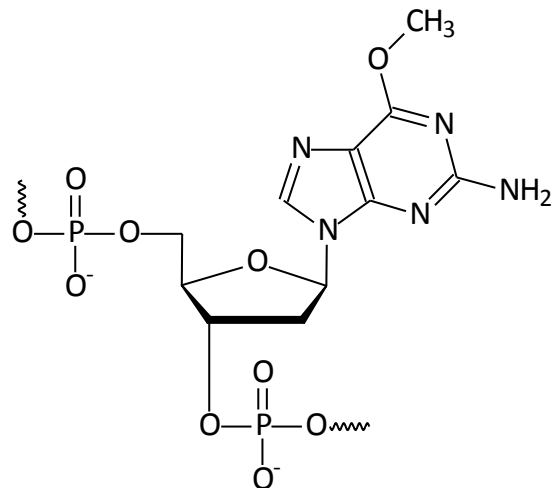

Methylated DNA:  
O(6)-methylguanine residue

Supplement: MOESM1 [file 9625038]
